# Supplementary material
Source: publisher figshare collection journal article supplement (https://gsapubs.figshare.com/ndownloader/files/22411716)
Supplement: Supplementary file 1 [file 22411716]

| DR Table 1. Selected attributes of soil pedon descriptions for marine terraces. | | | | | | | | |  | |  | |
| --- | --- | --- | --- | --- | --- | --- | --- | --- | --- | --- | --- | --- |
| Location Identification* | Source of data+ | Bt thickness  (cm)# | Depth to Cox  (cm)** | Maximum  % clay++ | | Bt  Hue## | | Marine terrace  level*** | | Easting  ### | | Northing  ### | |
| 08CA605247 | NRCS | 50 | 105 | 22 | 10 YR 4/4 | | 1 | | 402673.4 | | 4547109.5 | |
| 13LRN1CR1220 | Padgett | 0 | 98 | 21 | 10 YR 6/4 | | 1 | | 407555.9 | | 4541447.8 | |
| 06CA605030 | NRCS | >75 | >155 | 18 | 10 YR 4/6 | | 2 | | 405801 | | 4557103 | |
| 06CA605037 | NRCS | 0 | 115 | 18 | 2.5 Y 4/3 | | 2 | | 405328 | | 4557166 | |
| 08CA605208 | NRCS | >109 | >165 | 29 | 10 YR 5/6 | | 2 | | 402928 | | 4553485 | |
| 08CA605210 | NRCS | 81 | 143 | 29 | 10 YR 5/6 | | 2 | | 403445 | | 4547704 | |
| 08CA605211 | NRCS | 0 | 155 | 18 | 10 YR 4/4 | | 2 | | 402662 | | 4547135 | |
| 08CA605214 | NRCS | 0 | 165 | 17 | 10 YR 4/6 | | 2 | | 402993 | | 4547513 | |
| 08CA605221 | NRCS | 0 | 160 | 10 | 10 YR 5/6 | | 2 | | 406182 | | 4543560 | |
| 08CA605244 | NRCS | 0 | 95 | 13 | 10 YR 4/4 | | 2 | | 405632 | | 4544572 | |
| 08CA605299 | NRCS | 0 | 130 | 15 | 10 YR 4/4 | | 2 | | 408423 | | 4538693 | |
| 08CA605300 | NRCS | 0 | 139 | 16 | 10 YR 4/6 | | 2 | | 407921 | | 4538620 | |
| 08CA605306 | NRCS | 0 | 169 | 13 | 10 YR 4/3 | | 2 | | 407534 | | 4539069 | |
| 13BP2FC799 | Padgett | 154 | 179 | 31 | 10 YR 6/4 | | 2 | | 407129.9 | | 4542908.6 | |
| 13DH1DP4050 | Padgett | 0 | 245 | 17 | 10 YR 4/6 | | 2 | | 407853.5 | | 4536961.6 | |
| 84.1.TR2-24 | Burke | 0 | 67 | 22 | 10 YR 2/2 | | 2 | | 404877.9 | | 4557213.6 | |
| 84.2.TR2-24-1 | Burke | 0 | 168 | 26 | na+++ | | 2 | | 405056.5 | | 4556746.4 | |
| 84.3.TR3-DJ | Burke | 33 | 113 | 29 | 7.5 YR 4/6 | | 2 | | 403885.1 | | 4547001.3 | |
| 84.4.TR4-HL | Burke | 0 | 84 | 26 | 7.5 YR 4/6 | | 2 | | 403727.8 | | 4546626.4 | |
| 84.5.CR2-McK | Burke | 0 | 116 | 25 | 7.5 YR 4/4 | | 2 | | 406237.9 | | 4543304.3 | |
| 84.6.CR1_WH | Burke | 0 | 104 | 25 | 7.5 YR 5/7 | | 2 | | 406652.8 | | 4543462.1 | |
| 84.8.AN19-2 | Burke | 0 | 152 | 10 | 10 YR 3/3 | | 2 | | 406331.2 | | 4536248 | |
| 84.9.AN19-3 | Burke | 53 | 47 | 20 | 10 YR 4/4 | | 2 | | 406591.2 | | 35736.1 | |
| 84.22.AN29-2 | Burke | 53 | 137 | 41 | 10 YR 3/3 | | 2 | | 407832.9 | | 4535953.6 | |
| 84.23.AN29-1 | Burke | 56 | 101 | 38 | 10 YR 5/6 | | 2 | | ~407832.9 | | ~4535954 | |
| 08CA605202 | NRCS | 126 | 153 | 32 | 7.5 YR 4/6 | | 3 | | 403478 | | 4553072 | |
| 08CA605203 | NRCS | >144 | >173 | 32 | 2.5 Y 5/1 | | 3 | | 403550 | | 4553581 | |
| 08CA605205 | NRCS | 125 | 158 | 30 | 10 YR 7/6 | | 3 | | 403700 | | 4554377 | |
| 08CA605207 | NRCS | >145 | >160 | 39 | 10 YR 4/4 | | 3 | | 403090 | | 4552013 | |
| 08CA605219 | NRCS | 54 | 80 | 16 | 10 YR 3/4 | | 3 | | 402610 | | 4550607 | |
| 08CA605247 | NRCS | 80 | 120 | 23 | 10 YR 3/4 | | 3 | | 407160 | | 4542330 | |
| 13CW2CR1200 | Padgett | 96 | 154 | 26 | 10 YR 5/8 | | 3 | | 408729.4 | | 4541462.7 | |
| 13SE2CR1013 | Padgett | 53 | 101 | 30 | 10 YR 5/6 | | 3 | | 405363.1 | | 4546705.7 | |
| 13RS2BL3915 | Padgett | 165 | 192 | 35 | 10 YR 5/8 | | 3 | | 403448.9 | | 4552767.2 | |
| 84.20.CR3-HT | Burke | 75 | 104 | 40 | 7.5 YR 5/8 | | 3 | | 407014.7 | | 4544475.9 | |
| 84.21.CR30-1 | Burke | 57 | 75 | 36 | 7.5 YR 5/8 | | 3 | | 406287.4 | | 4545757.7 | |
| 07CA605118 | NRCS | >127 | >150 | 47 | 10 YR 6/2 | | 4 | | 407049 | | 4546584 | |
| 07CA605121 | NRCS | 72 | 105 | 31 | 7.5 YR 4/6 | | 4 | | 40400 | | 4551039 | |
| 07CA605125 | NRCS | >115 | >150 | 33 | 10 YR 5/6 | | 4 | | 409443 | | 4542900 | |
| 07CA605126 | NRCS | >125 | 160 | 40 | 10 YR 6/4 | | 4 | | 408723 | | 4543134 | |
| 07CA605135 | NRCS | 172 | >170 | 36 | 7.5 YR 4/6 | | 4 | | 408998 | | 4543174 | |
| 13SE4CR1013 | Padgett | 135 | 213 | 34 | 10 YR 5/6 | | 4 | | 405849.6 | | 47216.9 | |
| 13CM4BL3915 | Padgett | 185 | 220 | 31 | 10 YR 5/8 | | 4 | | 403688.6 | | 4552584.8 | |
| 13ME3CR2002 | Padgett | 211 | 241 | 34 | 5 YR 4/6 | | 4 | | 409617.1 | | 4539495.2 | |
| 84.30.FF1-4 | Burke | 111 | 153 | 47 | 5 YR 5/8 | | 4 | | 407366.5 | | 4546292.1 | |
| 07CA605109 | NRCS | >119 | >150 | 43 | 10 YR 5/6 | | 5 | | 404505 | | 4551390 | |
| 07CA605110 | NRCS | 143 | 180 | 37 | 10 YR 5/1 | | 5 | | 405543 | | 4548977 | |
| 07CA605111 | NRCS | >129 | >150 | 38 | 10 YR 5/8 | | 5 | | 404927 | | 4549014 | |
| 07CA605113 | NRCS | >115 | >150 | 39 | 10 YR 5/6 | | 5 | | 406525 | | 4548200 | |
| 07CA605114 | NRCS | >133 | >150 | 38 | 10 YR 5/6 | | 5 | | 404185 | | 4549783 | |
| 07CA605115 | NRCS | >123 | >150 | 39 | 10 YR 5/6 | | 5 | | 404792 | | 4549817 | |
| 07CA605116 | NRCS | >133 | >150 | 37 | 7.5 YR 5/8 | | 5 | | 407662 | | 4547222 | |
| 07CA605117 | NRCS | >112 | >150 | 45 | 10 YR 6/2 | | 5 | | 406967 | | 4547875 | |
| 07CA605127 | NRCS | >132 | >152 | 38 | 10 YR 6/6 | | 5 | | 407528 | | 4547384 | |
| 13SE5CR1013 | Padgett | 211 | 234 | 36 | 10 YR 5/6 | | 5 | | 406464.7 | | 4548084.7 | |
| 13WCR1012 | Padgett | >224 | >290 | 40 | 10 YR 5/8 | | 5 | | 406973.6 | | 4547986.6 | |
| Footnotes  * Location name: first two digits are the year of pedon description and the rest of the identifier is a alpha-numeric code specific to the source of the data (see adjacent column). (1)  + Three sources of data: NRCS, Natural Resources Conservation Service, data provided by Joseph Seney, Redwood National Park; Burke, pedon description provided by Raymond Bud Burke, Humboldt State University (Carver et al., 1985); Padgett, pedon descriptions by Jason Padgett.  # Bt thickness for the selected pedon.  ** Depth to the top of the oxidated C horizon, delineating the base of the B horizon and the top of the identifiably weathered parent material.  ++ Field-based estimate of the maximum percentage of clay observed in a depth interval in the B horizon. The field estimate is a qualitative assessment based on textural feel in the field setting. Estimates are calibrated by occasional training of textural feel in the soil lab using standards of known clay percent.  ## Field-based estimate of Bt hue. The field estimate is a qualitative assessment based on a matched relation to a Munsell Soil Color Chart chip using moist pedon and direct sunlight.  *** Pedon descriptions occur at sites on all four marine terrace levels, and these descriptions are tabulated from the youngest marine terrace (number 1) to the oldest marine terrace (number 4).  +++ na, not available  ### Map datum is WGS 1984, Standard UTM, zone 10 Northern Hemisphere | | | | | | | | |  | |  | |
